# Supplementary material
Source: Elsevier journal article supplement (https://www.sciencedirect.com/science/article/pii/S1889183722000666)
Supplement: mmc1 [file S1889183722000666:mmc1.pdf]

## RECOMENDACIONES PARA AMPA

Auto Medida de la Presión Arterial ('tensión arterial')

### Información para el paciente

#### ¿ Qué aparato comprar ?

Compre un [aparato automático de brazo](#) que esté validado (aprobado por asociaciones científicas) salvo que su médico o enfermera le hayan recomendado otro tipo de aparato.

#### Antes de tomarse la tensión

- No se tome la tensión justo después de las comidas o de hacer ejercicio físico, deje pasar al menos media hora
- No se tome la tensión con dolor, con ganas de orinar, con angustia o estrés, tómese la tensión en circunstancias normales
- No tome alcohol ni café y no fume en la media hora antes de tomarse la tensión... mejor no fume nunca

#### Toma de tensión

- Siéntese en una silla cómoda con la espalda apoyada y no cruce las piernas
- Tómese la tensión siempre en el mismo brazo, ponga el brazo estirado, apoyado, relajado y sin ropa ajustada
- Colóquese el manguito de tomar la tensión
- Repose en esta posición 5 minutos antes de empezar a tomarse la tensión
- No hable ni mueva el brazo mientras se esté tomando la tensión
- Realice 3 tomas y anote los resultados
- Anote también las dudas que tenga
- Deje pasar entre 1 y 2 minutos entre cada toma de tensión
- Si está tomando medicamentos para la tensión, tómese la tensión por la mañana antes de desayunar y de tomar la medicación y a última hora de la tarde antes de cenar y de tomar la medicación
- Lleve siempre las anotaciones cuando acuda a su médico o enfermera
- Si su tensión está bien controlada hará AMPA una o dos veces al mes

#### Otras recomendaciones:

- Siga siempre los cuidados básicos para el paciente hipertenso: dieta con poca sal, con bastantes frutas, verduras y pescados, con pocas grasas; hacer ejercicio y perder peso en caso de sobrepeso-obesidad; no beber alcohol y no fumar.
- No se olvide de tomar los medicamentos.
- No modifique el tratamiento sin consultar con su médico.
- El aparato de tensión debe ser revisado al menos una vez al año por el servicio técnico recomendado por el fabricante.

Encontrará más información en la Web [www.seh-lelha.org](http://www.seh-lelha.org)

## Anote su tensión

|        |               |        |        |              |        |
|--------|---------------|--------|--------|--------------|--------|
| Fecha: |               |        |        |              |        |
|        | Por la mañana |        |        | Por la tarde |        |
|        | Máxima        | Mínima |        | Máxima       | Mínima |
| Toma 1 |               |        | Toma 1 |              |        |
| Toma 2 |               |        | Toma 2 |              |        |
| Toma 3 |               |        | Toma 3 |              |        |

|        |               |        |        |              |        |
|--------|---------------|--------|--------|--------------|--------|
| Fecha: |               |        |        |              |        |
|        | Por la mañana |        |        | Por la tarde |        |
|        | Máxima        | Mínima |        | Máxima       | Mínima |
| Toma 1 |               |        | Toma 1 |              |        |
| Toma 2 |               |        | Toma 2 |              |        |
| Toma 3 |               |        | Toma 3 |              |        |

|        |               |        |        |              |        |
|--------|---------------|--------|--------|--------------|--------|
| Fecha: |               |        |        |              |        |
|        | Por la mañana |        |        | Por la tarde |        |
|        | Máxima        | Mínima |        | Máxima       | Mínima |
| Toma 1 |               |        | Toma 1 |              |        |
| Toma 2 |               |        | Toma 2 |              |        |
| Toma 3 |               |        | Toma 3 |              |        |

|               |               |        |               |              |        |
|---------------|---------------|--------|---------------|--------------|--------|
| Fecha:        |               |        |               |              |        |
|               | Por la mañana |        |               | Por la tarde |        |
|               | Máxima        | Mínima |               | Máxima       | Mínima |
| Toma 1        |               |        | Toma 1        |              |        |
| Toma 2        |               |        | Toma 2        |              |        |
| <b>Toma 3</b> |               |        | <b>Toma 3</b> |              |        |

|               |               |        |        |              |        |
|---------------|---------------|--------|--------|--------------|--------|
| <b>Fecha:</b> |               |        |        |              |        |
|               | Por la mañana |        |        | Por la tarde |        |
|               | Máxima        | Mínima |        | Máxima       | Mínima |
| Toma 1        |               |        | Toma 1 |              |        |
| Toma 2        |               |        | Toma 2 |              |        |
| Toma 3        |               |        | Toma 3 |              |        |

|               |               |        |        |              |        |
|---------------|---------------|--------|--------|--------------|--------|
| <b>Fecha:</b> |               |        |        |              |        |
|               | Por la mañana |        |        | Por la tarde |        |
|               | Máxima        | Mínima |        | Máxima       | Mínima |
| Toma 1        |               |        | Toma 1 |              |        |
| Toma 2        |               |        | Toma 2 |              |        |
| Toma 3        |               |        | Toma 3 |              |        |

|               |               |        |        |              |        |
|---------------|---------------|--------|--------|--------------|--------|
| <b>Fecha:</b> |               |        |        |              |        |
|               | Por la mañana |        |        | Por la tarde |        |
|               | Máxima        | Mínima |        | Máxima       | Mínima |
| Toma 1        |               |        | Toma 1 |              |        |
| Toma 2        |               |        | Toma 2 |              |        |
| Toma 3        |               |        | Toma 3 |              |        |
