# Supplementary material
Source: Elsevier journal article supplement (https://www.sciencedirect.com/science/article/pii/S1889183722000666)
Supplement: mmc2 [file S1889183722000666:mmc2.pdf]

**Tabla S1. Clasificación de la presión arterial clínica (en consulta) y definiciones de los grados de hipertensión arterial según las guías americanas (ACC/AHA) y de la Sociedad Internacional de Hipertensión (ISH).**

**Clasificación y definiciones según la guía ACC/AHA**

| Categoría de PA     | PAS            |   | PAD          |
|---------------------|----------------|---|--------------|
| PA normal           | < 120 mmHg     | y | < 80 mmHg    |
| PA elevada          | 120 - 129 mmHg | y | < 80 mmHg    |
| <b>Hipertensión</b> |                |   |              |
| HTA estadio 1       | 130 - 139 mmHg | o | 80 - 89 mmHg |
| HTA estadio 2       | ≥ 140 mmHg     | o | ≥ 90 mmHg    |

**Clasificación y definiciones según la guía de la ISH**

| Categoría de PA | PAS            |   | PAD          |
|-----------------|----------------|---|--------------|
| PA normal       | < 130 mmHg     | y | < 85 mmHg    |
| PA normal-alta  | 130 - 139 mmHg | o | 85 - 89 mmHg |
| HTA grado 1     | 140 - 159 mmHg | o | 90 - 99 mmHg |
| HTA grado 2     | ≥ 160 mmHg     | o | ≥ 100 mmHg   |

Las definiciones se basan en la PA medida en sedestación en la consulta. La PA para la clasificación se basará en la media de 2 o más lecturas, en 2 o más ocasiones separadas 1-2 semanas, siguiendo las recomendaciones estandarizadas para medidas de calidad. Los sujetos con PAS y PAD en categorías diferentes se clasificarán en la categoría más alta.

ACC, *American College of Cardiology*; AHA, *American Heart Association*; ISH, *International Society of Hypertension*; PA, presión arterial; PAS, presión arterial sistólica; PAD, presión arterial diastólica; HTA, hipertensión arterial.

Referencias Williams B et al [17][18], Whelton PK et al [11][12], Unger T et al [21].

**Tabla S2. Información básica para la historia clínica del paciente hipertenso.**

| <b>Factores de riesgo</b>                                                                                                                                                                 |
|-------------------------------------------------------------------------------------------------------------------------------------------------------------------------------------------|
| Historia familiar y personal de HTA, enfermedad CV o renal                                                                                                                                |
| Historia familiar y personal de factores de riesgo CV asociados (p.ej. hipercolesterolemia familiar)                                                                                      |
| Historia de consumo de tabaco                                                                                                                                                             |
| Historia dietética y de consumo de sal                                                                                                                                                    |
| Consumo de alcohol                                                                                                                                                                        |
| Historia de sedentarismo o de ejercicio físico                                                                                                                                            |
| Historia de disfunción eréctil                                                                                                                                                            |
| Historia de sueño, ronquidos o de apnea del sueño                                                                                                                                         |
| Historia previa de HTA en el embarazo, preeclampsia                                                                                                                                       |
| <b>Historia de lesión subclínica de órgano diana, enfermedad CV o renal</b>                                                                                                               |
| Cerebro y ojos: cefalea, vértigo, síncope, alteraciones visuales, ictus, revascularización carotídea, deterioro cognitivo, demencia                                                       |
| Corazón: dolor torácico, disnea, edemas, infarto de miocardio, revascularización coronaria, síncope, palpitaciones, arritmias (sobre todo, fibrilación auricular), insuficiencia cardíaca |
| Riñón: sed, poliuria, nicturia, hematuria, infecciones urinarias                                                                                                                          |
| Arterias periféricas: frialdad de extremidades, claudicación intermitente, dolor en reposo, revascularización periférica                                                                  |
| Historia familiar o personal de ERC (p.ej. enfermedad renal poliquística)                                                                                                                 |

HTA, hipertensión arterial; CV, cardiovascular; ERC, enfermedad renal crónica.

Adaptada de Williams B et al [17][18].

**Tabla S3. Exploración física básica del paciente hipertenso.**

|                                                                                                                                                   |
|---------------------------------------------------------------------------------------------------------------------------------------------------|
| <b>Datos antropométricos</b>                                                                                                                      |
| Peso y estatura medidos con báscula y tallímetro calibrados, cálculo del IMC                                                                      |
| Perímetro de la cintura                                                                                                                           |
| <b>Signos de lesión de órgano diana</b>                                                                                                           |
| Examen neurológico y cognitivo                                                                                                                    |
| Fondo de ojo, en HTA grado 2-3                                                                                                                    |
| Exploración cardíaca y carotídea                                                                                                                  |
| Palpación de arterias periféricas                                                                                                                 |
| Medida de la PA en ambos brazos (al menos en una ocasión)                                                                                         |
| <b>Sospecha de HTA secundaria</b>                                                                                                                 |
| Manchas café con leche o neurofibromatosis (feocromocitoma)                                                                                       |
| Auscultación torácica y abdominal (soplos de coartación de aorta, enfermedad renovascular)                                                        |
| Palpación de masas abdominales (poliquistosis renal)                                                                                              |
| Comparación de PA o de pulsos entre brazos y piernas (coartación de aorta)                                                                        |
| Signos de enfermedad tiroidea (hipertiroidismo: taquicardia, fibrilación auricular, exoftalmos; hipotiroidismo: bradicardia, debilidad, mixedema) |
| Signos de enfermedad de Cushing (obesidad, hirsutismo, atrofia cutánea, estrías violáceas, debilidad, osteopenia)                                 |
| Signos de acromegalia (agrandamiento de manos, pies, mandíbula y frente)                                                                          |

IMC, índice de masa corporal; HTA, hipertensión arterial; PA, presión arterial.

Adaptada de Williams B et al [17][18].

**Tabla S4. Exploraciones complementarias avanzadas en el paciente hipertenso.**

|                                                                                                                                                                 |
|-----------------------------------------------------------------------------------------------------------------------------------------------------------------|
| <b>Ecocardiograma</b>                                                                                                                                           |
| Evaluación de la estructura y función cardíacas, indicada cuando la información conlleve decisiones terapéuticas                                                |
| <b>Ecografía vascular</b>                                                                                                                                       |
| Detección de ateromatosis o estenosis, indicada en pacientes con enfermedad cerebrovascular o enfermedad arterial periférica a otros niveles                    |
| <b>Ecografía abdominal / estudio Doppler</b>                                                                                                                    |
| Evaluación del tamaño y estructura renales, exclusión de obstrucción del tracto urinario, indicada en la evaluación de la HTA con ERC                           |
| Evaluación de la aorta abdominal, indicada en enfermedad vascular periférica a otros niveles                                                                    |
| Estudio Doppler de arterias renales, indicado en caso de sospecha de HTA renovascular, especialmente en caso de asimetría renal                                 |
| Evaluación inicial de las glándulas suprarrenales, indicada en caso de sospecha de HTA secundaria de origen adrenal (TC o RM para una evaluación más detallada) |
| <b>Índice tobillo-brazo</b>                                                                                                                                     |
| Evaluación de enfermedad arterial periférica                                                                                                                    |
| <b>Velocidad de onda de pulso</b>                                                                                                                               |
| Evaluación de la rigidez aórtica                                                                                                                                |
| <b>Pruebas de función cognitiva</b>                                                                                                                             |
| Evaluación de la función cognitiva, indicada en sospecha de deterioro cognitivo                                                                                 |
| <b>Pruebas de imagen cerebrales</b>                                                                                                                             |
| Evaluación de posibles lesiones isquémicas o hemorrágicas, indicada en casos con historia de enfermedad cerebrovascular o de deterioro cognitivo                |

HTA, hipertensión arterial; ERC, enfermedad renal crónica; TC, tomografía computarizada; RM, resonancia magnética.

Adaptada de Williams B et al [17][18].

**Tabla S5. Datos clínicos de sospecha de las causas más frecuentes de hipertensión arterial secundaria.**

|                                                                                                                                                                                                                                                                                                                                                                                                                                                                                                         |
|---------------------------------------------------------------------------------------------------------------------------------------------------------------------------------------------------------------------------------------------------------------------------------------------------------------------------------------------------------------------------------------------------------------------------------------------------------------------------------------------------------|
| <b>Enfermedad renal parenquimatosa</b>                                                                                                                                                                                                                                                                                                                                                                                                                                                                  |
| Datos analíticos de ERC como aumento de la excreción urinaria de albúmina o proteínas, alteraciones en el sedimento urinario o descenso del filtrado glomerular                                                                                                                                                                                                                                                                                                                                         |
| <b>HTA renovascular - fibrodisplasia</b>                                                                                                                                                                                                                                                                                                                                                                                                                                                                |
| <ul style="list-style-type: none"> <li>• HTA en mujeres jóvenes sin otros factores de riesgo de HTA esencial o de riesgo cardiovascular, particularmente en casos con HTA grado 2-3 (PA <math>\geq</math>160/100 mmHg) o con alteraciones renales asociadas</li> <li>• HTA en mujeres jóvenes con soplo abdominal</li> </ul>                                                                                                                                                                            |
| <b>HTA renovascular aterosclerótica</b>                                                                                                                                                                                                                                                                                                                                                                                                                                                                 |
| <ul style="list-style-type: none"> <li>• HTA <i>de novo</i> o empeoramiento en el control de HTA previa en pacientes con aterosclerosis a otros niveles, asimetría renal &gt;1,5 cm o con soplo abdominal</li> <li>• Deterioro agudo de función renal (elevación de la creatinina sérica &gt;30%) tras inicio de tratamiento con un fármaco bloqueante del sistema renina-angiotensina</li> <li>• Episodios de crisis hipertensivas con edema agudo de pulmón no justificable por otra causa</li> </ul> |
| <b>Hiperaldosteronismo primario</b>                                                                                                                                                                                                                                                                                                                                                                                                                                                                     |
| Hipopotasemia espontánea o inducida por diuréticos                                                                                                                                                                                                                                                                                                                                                                                                                                                      |
| <b>Síndrome de Cushing</b>                                                                                                                                                                                                                                                                                                                                                                                                                                                                              |
| Cambios corporales sugestivos como ganancia de peso sin causa aparente, obesidad central, cara de luna llena, acúmulo graso cervical, estrías purpúreas, hirsutismo, atrofia muscular, hiperglucemia                                                                                                                                                                                                                                                                                                    |
| <b>Feocromocitoma</b>                                                                                                                                                                                                                                                                                                                                                                                                                                                                                   |
| Crisis hipertensivas acompañadas de cefalea, palpitaciones y sudoración <sup>a</sup>                                                                                                                                                                                                                                                                                                                                                                                                                    |
| <b>Hipertiroidismo o hipotiroidismo</b>                                                                                                                                                                                                                                                                                                                                                                                                                                                                 |
| <ul style="list-style-type: none"> <li>• Síntomas de hipertiroidismo (palpitaciones, pérdida de peso, ansiedad, intolerancia al calor)</li> <li>• Síntomas de hipotiroidismo (ganancia de peso, debilidad, estreñimiento)</li> <li>• Alteración analítica de la TSH</li> </ul>                                                                                                                                                                                                                          |
| <b>Hiperparatiroidismo</b>                                                                                                                                                                                                                                                                                                                                                                                                                                                                              |
| Hipercalcemia, PTHi elevada                                                                                                                                                                                                                                                                                                                                                                                                                                                                             |
| <b>Acromegalia</b>                                                                                                                                                                                                                                                                                                                                                                                                                                                                                      |
| Fenotipo correspondiente (agrandamiento de manos, pies, mandíbula y frente)                                                                                                                                                                                                                                                                                                                                                                                                                             |
| <b>Síndrome de apnea / hipopnea del sueño</b>                                                                                                                                                                                                                                                                                                                                                                                                                                                           |
| Obesidad, sujetos roncadores, pausas de apnea durante el sueño, somnolencia diurna, fatigabilidad aumentada, confusión matutina                                                                                                                                                                                                                                                                                                                                                                         |
| <b>Coartación de aorta</b>                                                                                                                                                                                                                                                                                                                                                                                                                                                                              |
| HTA en miembros superiores y PA normal o baja en miembros inferiores, soplo interescapular                                                                                                                                                                                                                                                                                                                                                                                                              |
| <b>Fármacos y drogas</b>                                                                                                                                                                                                                                                                                                                                                                                                                                                                                |
| <ul style="list-style-type: none"> <li>• Relación cronológica entre el uso de un fármaco y el desarrollo de HTA</li> <li>• Con frecuencia un fármaco de este tipo ocasiona un empeoramiento en el control de una HTA esencial o induce resistencia al tratamiento</li> </ul>                                                                                                                                                                                                                            |

<sup>a</sup> Las 5 Ps: *paroxysmal hypertension, pounding headache, perspiration, palpitations, pallor* [25]

ERC, enfermedad renal crónica; HTA, hipertensión arterial; PA, presión arterial; TSH, hormona estimulante de la tiroides; PTHi, parathormona intacta.

Modificada de Santamaría R, Gorostidi M [26].

**Tabla S6. Fármacos antihipertensivos comercializados en España para uso vía oral, rangos de dosis e intervalos de administración.**

| Fármaco                         | Rango de dosis, mg/día | Intervalo de administración, horas |
|---------------------------------|------------------------|------------------------------------|
| <b>Diuréticos</b>               |                        |                                    |
| Tiazidas y derivados            |                        |                                    |
| Altizida <sup>a</sup>           | 15 – 60                | 12 – 24                            |
| Bendroflumetiazida <sup>a</sup> | 5                      | 24                                 |
| Clortalidona                    | 12,5 – 50              | 24 – 48                            |
| Hidroclorotiazida               | 12,5 – 50              | 24                                 |
| Indapamida                      | 0,625 – 2,5            | 24                                 |
| Xipamida                        | 10 – 20                | 24                                 |
| Diuréticos de asa               |                        |                                    |
| Furosemida                      | 40 – 240 <sup>b</sup>  | 12 – 24 <sup>b</sup>               |
| Torasemida                      | 6 – 12                 | 12 – 24                            |
| Diuréticos distales             |                        |                                    |
| Amilorida <sup>a</sup>          | 2,5 – 5                | 12 – 24                            |
| Eplerenona                      | 25 – 50                | 12 – 24                            |
| Espironolactona                 | 25 – 50 <sup>b</sup>   | 12 – 24                            |
| Triamtereno <sup>a</sup>        | 25 – 50                | 24 – 48                            |
| <b>Betabloqueantes</b>          |                        |                                    |
| Betabloqueantes                 |                        |                                    |
| Atenolol                        | 25 – 100               | 12 – 24                            |
| Bisoprolol                      | 2,5 – 20               | 24                                 |
| Metoprolol                      | 50 – 200               | 24                                 |
| Propranolol                     | 40 – 640               | 8 – 12                             |
| Alfa-betabloqueantes            |                        |                                    |
| Carvedilol                      | 12,5 – 50              | 12                                 |
| Labetalol                       | 200 – 2400             | 8 – 12                             |
| Con acción vasodilatadora       |                        |                                    |
| Nebivolol                       | 2,5 – 5                | 24                                 |
| <b>Calcioantagonistas</b>       |                        |                                    |
| Dihidropiridínicos              |                        |                                    |
| Amlodipino                      | 2,5 – 10               | 24                                 |
| Barnidipino                     | 10 – 20                | 24                                 |
| Felodipino                      | 5 – 10                 | 24                                 |
| Lacidipino                      | 2 – 6                  | 24                                 |
| Lercanidipino                   | 5 – 20                 | 24                                 |
| Manidipino                      | 10 – 20                | 24                                 |
| Nicardipino                     | 60 – 90                | 8 – 12                             |
| Nifedipino                      | 20 – 120               | 12 – 24                            |
| Nitrendipino                    | 10 – 40                | 12 – 24                            |
| No dihidropiridínicos           |                        |                                    |
| Diltiazem                       | 90 – 360               | 8 – 24                             |
| Verapamil                       | 120 – 480              | 12 – 24                            |
| <b>IECA</b>                     |                        |                                    |
| Benazepril                      | 10 – 40                | 12 – 24                            |

|                                          |            |         |
|------------------------------------------|------------|---------|
| Captopril                                | 25 – 150   | 8 – 12  |
| Cilazapril                               | 5          | 24      |
| Delapril <sup>c</sup>                    | 30         | 24      |
| Enalapril                                | 5 – 40     | 12 – 24 |
| Fosinopril                               | 10 – 40    | 24      |
| Imidapril                                | 2,5 – 10   | 24      |
| Lisinopril                               | 5 – 40     | 24      |
| Perindopril                              | 2 – 8      | 24      |
| Quinapril                                | 5 – 80     | 24      |
| Ramipril                                 | 1,25 – 10  | 24      |
| Trandolapril                             | 0,5 – 8    | 24      |
| <b>ARA II</b>                            |            |         |
| Candesartán                              | 8 – 32     | 24      |
| Eprosartán                               | 600 – 1200 | 24      |
| Irbesartán                               | 75 – 300   | 24      |
| Losartán                                 | 25 – 100   | 12 – 24 |
| Olmesartán                               | 10 – 40    | 24      |
| Telmisartán                              | 20 – 80    | 24      |
| Valsartán                                | 40 – 320   | 24      |
| <b>Inhibidores directos de la renina</b> |            |         |
| Aliskirén                                | 150 – 300  | 24      |
| <b>Otros</b>                             |            |         |
| Alfabloqueantes                          |            |         |
| Doxazosina <sup>d</sup>                  | 1 – 16     | 12 – 24 |
| Prazosina                                | 1 – 20     | 12      |
| Terazosina                               | 1 – 20     | 12 – 24 |
| Fármacos de acción central               |            |         |
| Alfametildopa                            | 500 – 3000 | 8 – 12  |
| Clonidina                                | 0,3 – 2,4  | 12      |
| Moxonidina                               | 6 – 12     | 24      |
| Vasodilatadores arteriales directos      |            |         |
| Hidralacina                              | 50 – 200   | 8 – 12  |
| Minoxidil                                | 2,5 – 40   | 12 – 24 |

Los fármacos se exponen por orden alfabético dentro de cada grupo.

<sup>a</sup> Altizida, Bendroflumetiazida, Amilorida y Triamtereno se comercializan en asociaciones a dosis fijas con otros diuréticos.

<sup>b</sup> Dosis más altas de Furosemida (o periodos de administración más cortos) y de Espironolactona pueden ser necesarios en el tratamiento de la insuficiencia cardiaca o del hiperaldosteronismo primario, respectivamente.

<sup>c</sup> Delapril está comercializado en asociación fija con Manidipino.

<sup>d</sup> Preferiblemente de liberación prolongada dado el riesgo de hipotensión ortostática con la formulación convencional.

IECA, inhibidor de la enzima de conversión de la angiotensina; ARAII, antagonista de los receptores de la angiotensina.

Fuente: Centro de información online de medicamentos. Agencia Española de Medicamentos y Productos Sanitarios. Ministerio de Sanidad. <https://cima.aemps.es/cima/publico/home.html>

**Tabla S7. Estrategia básica para el tratamiento de la hipertensión arterial asociada a cardiopatía isquémica.**

Programar escalones de tratamiento para alcanzar el control en un plazo máximo de 2-3 meses. El período para decidir una escalada de tratamiento será de 15-30 días

| Escalón | Estrategia                                         | Fármacos                                                         | Observaciones                                                                                                                               |
|---------|----------------------------------------------------|------------------------------------------------------------------|---------------------------------------------------------------------------------------------------------------------------------------------|
| 1       | Inicio con combinación doble en un solo comprimido | IECA o ARA II + BB o CA o CA + diurético o BB o BB + diurético * | Considerar inicio de tratamiento farmacológico con PAS $\geq$ 130 mmHg<br>Considerar monoterapia inicial en casos de PA mínimamente elevada |
| 2       | Combinación triple en un solo comprimido           | Triple combinación con los anteriores <sup>a</sup>               |                                                                                                                                             |
| 3       | Combinación triple + cuarto fármaco                | Espironolactona como cuarto fármaco de elección                  | Considerar la derivación a una unidad especializada en caso de HTA resistente                                                               |

<sup>a</sup> En España no están comercializadas combinaciones de IECA o ARA II con BB ni de CA con diurético. La combinación de BB y diurético debe evitarse en caso de riesgo de desarrollo de diabetes.

Evitar la combinación de BB con CA no dihidropiridínicos (Verapamil y Diltiazem).

IECA, inhibidor de la enzima de conversión de la angiotensina; ARAII, antagonista de los receptores de la angiotensina; BB, betabloqueante; CA, calcioantagonista; PAS, presión arterial sistólica; PA, presión arterial; HTA, hipertensión arterial

Referencia Williams B et al [17][18].



**Tabla S8. Estrategia básica para el tratamiento de la hipertensión arterial asociada a enfermedad renal crónica.**

Programar escalones de tratamiento para alcanzar el control en un plazo máximo de 2-3 meses. El período para decidir una escalada de tratamiento será de 15-30 días

| Escalón | Estrategia                                         | Fármacos                                                     | Observaciones                                                                                                  |
|---------|----------------------------------------------------|--------------------------------------------------------------|----------------------------------------------------------------------------------------------------------------|
| 1       | Inicio con combinación doble en un solo comprimido | IECA o ARA II + CA o IECA o ARA II + diurético <sup>a</sup>  | Monitorizar la función renal <sup>b</sup><br>Considerar monoterapia inicial en casos de PA mínimamente elevada |
| 2       | Combinación triple en un solo comprimido           | Triple combinación con los anteriores <sup>a</sup>           |                                                                                                                |
| 3       | Combinación triple + cuarto fármaco                | Espironolactona como cuarto fármaco de elección <sup>c</sup> | Considerar BB, otro tipo de diurético o alfa-bloqueantes como alternativa a Espironolactona                    |

<sup>a</sup> Diurético de asa en caso de FGe <30 mL/min/1,73 m<sup>2</sup>.

<sup>b</sup> Se puede observar un aumento de la creatinina sérica y una disminución del FGe en pacientes en relación con el inicio del tratamiento antihipertensivo, particularmente con IECA o ARA II. En caso de que el aumento de la creatinina sea >30% habrá que considerar la continuidad del tratamiento con IECA o ARA II y la posibilidad de una enfermedad renovascular.

<sup>c</sup> Precaución por el riesgo de hiperpotasemia, particularmente en caso de FGe <45 mL/min/1,73 m<sup>2</sup> o de potasio sérico >4,5 mEq/L.

IECA, inhibidor de la enzima de conversión de la angiotensina; ARAII, antagonista de los receptores de la angiotensina; BB, betabloqueante; CA, calcioantagonista; PA, presión arterial; FGe, filtrado glomerular estimado.

Referencia Williams B et al [17][18].

**Tabla S9. Estrategia básica para el tratamiento de la hipertensión arterial asociada a insuficiencia cardiaca.**

Programar escalones de tratamiento para alcanzar el control en un plazo máximo de 2-3 meses. El período para decidir una escalada de tratamiento será de 15-30 días

| Escalón                                                                                                                                                                                                                                                                                                                                                                                                                                                                                                                                                                                                                                                                                                                                           | Estrategia                    | Fármacos                                                                            | Observaciones                                                             |
|---------------------------------------------------------------------------------------------------------------------------------------------------------------------------------------------------------------------------------------------------------------------------------------------------------------------------------------------------------------------------------------------------------------------------------------------------------------------------------------------------------------------------------------------------------------------------------------------------------------------------------------------------------------------------------------------------------------------------------------------------|-------------------------------|-------------------------------------------------------------------------------------|---------------------------------------------------------------------------|
| 1                                                                                                                                                                                                                                                                                                                                                                                                                                                                                                                                                                                                                                                                                                                                                 | Inicio con combinación triple | IECA o ARA II <sup>a</sup> + diurético <sup>b</sup> (o diurético de asa) + BB       | Monitorizar la función renal y los niveles de potasio sérico <sup>c</sup> |
| 2                                                                                                                                                                                                                                                                                                                                                                                                                                                                                                                                                                                                                                                                                                                                                 | Combinación cuádruple         | IECA o ARA II <sup>a</sup> + diurético (o diurético de asa) <sup>b</sup> + BB + ARM | Monitorizar la función renal y los niveles de potasio sérico <sup>c</sup> |
| Cuando en insuficiencia cardiaca con fracción de eyección reducida no se requiera tratamiento antihipertensivo, el esquema terapéutico seguirá las recomendaciones de las <i>ESC Heart Failure Guidelines</i> [58]                                                                                                                                                                                                                                                                                                                                                                                                                                                                                                                                |                               |                                                                                     |                                                                           |
| <p>* Considerar el tratamiento con bloqueo dual ARNI Sacubitril / Valsartan según las recomendaciones de las <i>ESC Heart Failure Guidelines</i> [58], diurético de asa en caso de FGe &lt;30 mL/min/1,73 m<sup>2</sup>.</p> <p>** Diuréticos tiazídicos o similares a tiazidas; considerar diuréticos de asa como alternativa en casos con edemas o en caso de FGe &lt;45 mL/min/1,73 m<sup>2</sup>.</p> <p>*** En caso de aumento de la creatinina &gt;30% habrá que considerar la continuidad con los fármacos bloqueantes del sistema renina-angiotensina-aldosterona o reducir las dosis. Precaución por el riesgo de hiperpotasemia, particularmente en caso de FGe &lt;45 mL/min/1,73 m<sup>2</sup> o de potasio sérico &gt;4,5 mEq/L.</p> |                               |                                                                                     |                                                                           |

IECA, inhibidor de la enzima de conversión de la angiotensina; ARAII, antagonista de los receptores de la angiotensina; BB, betabloqueante; CA, calcioantagonista; PAS, presión arterial sistólica; PA, presión arterial; HTA, hipertensión arterial; ARM, antagonista de los receptores mineralcorticoides; ESC, *European Society of Cardiology*; ARNI, *Angiotensin Receptor and Neprilysin Inhibition*; FGe, filtrado glomerular estimado.

Referencia Williams B et al [17][18].

**Tabla S10. Estrategia básica para el tratamiento de la hipertensión arterial asociada a fibrilación auricular.**

Programar escalones de tratamiento para alcanzar el control en un plazo máximo de 2-3 meses. El período para decidir una escalada de tratamiento será de 15-30 días

| Fibrilación auricular                                                                                           |                               |                                                                                               |                                                                             |
|-----------------------------------------------------------------------------------------------------------------|-------------------------------|-----------------------------------------------------------------------------------------------|-----------------------------------------------------------------------------|
| Escalón                                                                                                         | Estrategia                    | Fármacos                                                                                      | Observaciones                                                               |
| 1                                                                                                               | Inicio con combinación triple | IECA o ARA II + BB o CA no-dihidropiridínico o BB + CA dihidropiridínico                      | Evitar BB + CA no-dihidropiridínico por su potencial efecto bradicardizante |
| 2                                                                                                               | Combinación triple            | IECA o ARA II + BB + CA dihidropiridínico o diurético o BB + CA dihidropiridínico + diurético | Evitar BB + CA no-dihidropiridínico por su potencial efecto bradicardizante |
| Anticoagulación oral según indicaciones del score CHA <sub>2</sub> DS <sub>2</sub> -VASc salvo contraindicación |                               |                                                                                               |                                                                             |

IECA, inhibidor de la enzima de conversión de la angiotensina; ARAII, antagonista de los receptores de la angiotensina; BB, betabloqueante; CA, calcioantagonista; CHA<sub>2</sub>DS<sub>2</sub>-VASc, *Cardiac failure, Hypertension, Age ≥75 (Doubled), Diabetes, Stroke (Doubled) - Vascular disease, Age 65-74, and Sex category (Female)*.

Referencia Williams B et al [17][18].
